# Supplementary material for: The impact of public health interventions on the future prevalence of ESBL-producing Klebsiella pneumoniae: a population based mathematical modelling study
Source: Springer Nature journal article supplement (doi:10.1186/s12879-022-07441-z), 2022-05-23
Supplement: MOESM2 [file 22766742]

**The impact of public health interventions on the future prevalence of *ESBL-producing Klebsiella pneumoniae*:  
a population based mathematical modelling study**

*Luisa Salazar-Vizcaya, et.al*

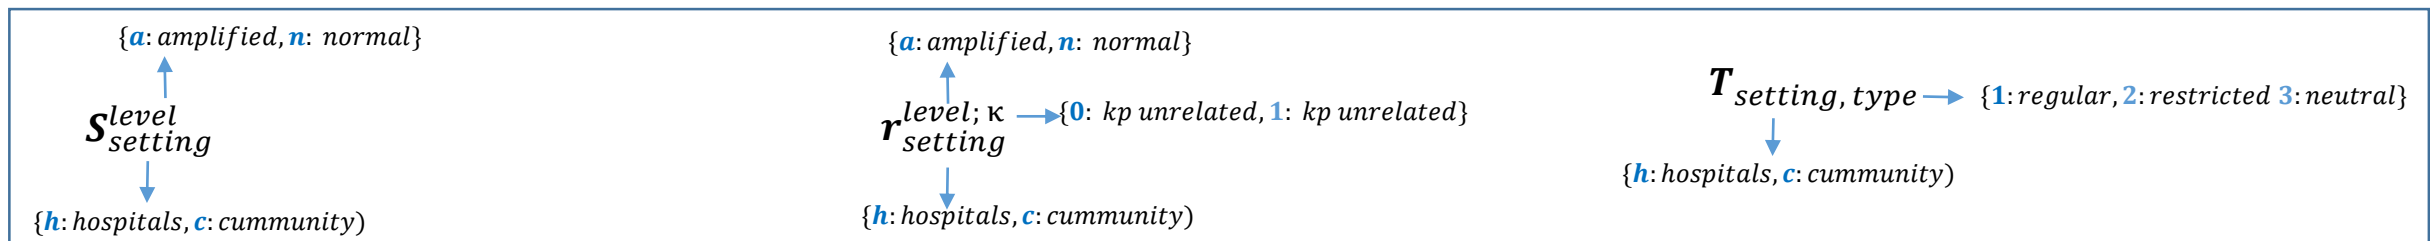

### Model equations

$$\dot{S}_{\text{setting}}^n = (-1)^\eta \left( \theta(t) S_{\text{setting}=\text{community}}^n - \mu_h S_{\text{setting}=\text{hospitals}}^n \right) - \frac{1}{N_{\text{setting}}} \beta_{\text{setting}} \left( r_{\text{setting}}^n + v_i \sum_{\kappa \in \{0,1\}} r_{\text{setting}}^{a;\kappa} \right) S_{\text{setting}}^n - \sum_{\text{type} \in \{1,2,3\}} T_{\text{setting}, \text{type}} (t) \omega^{[\text{type}/3]} S_{\text{setting}}^n + T_{\text{setting}, \text{type}=2} (t) \lambda \left( r_{\text{setting}}^n + r_{\text{setting}}^{a;\kappa=0} \right) + \alpha_{\text{setting}} \left( S_{\text{setting}}^a + r_{\text{setting}}^n + \sum_{\kappa \in \{0,1\}} r_{\text{setting}}^{a;\kappa} \right) - \epsilon(t) S_{\text{setting}}^n + \lambda \left( T' - \phi_{\text{setting}} \right) r_{\text{setting}}^{a;\kappa=1}$$

$$\dot{S}_{\text{setting}}^a = (-1)^\eta \left( \theta(t) S_{\text{setting}=\text{community}}^a - \mu_h S_{\text{setting}=\text{hospitals}}^a \right) - \frac{1}{N_{\text{setting}}} \beta_{\text{setting}} \left( r_{\text{setting}}^n + v_i \sum_{\kappa \in \{0,1\}} r_{\text{setting}}^{a;\kappa} \right) S_{\text{setting}}^a v_s + \sum_{\text{type} \in \{1,2,3\}} T_{\text{setting}, \text{type}} (t) \omega^{[\text{type}/3]} S_{\text{setting}}^n - \alpha_{\text{setting}} S_{\text{setting}}^a - \epsilon(t) S_{\text{setting}}^a v_s$$

$$\dot{r}_{\text{setting}}^n = (-1)^\eta \left( \theta(t) r_{\text{setting}}^n - \mu_h r_{\text{setting}=\text{hospitals}}^n \right) + \frac{1}{N_{\text{setting}}} \beta_{\text{setting}} \left( r_{\text{setting}}^n + v_i \sum_{\kappa \in \{0,1\}} r_{\text{setting}}^{a;\kappa} \right) S_{\text{setting}}^n - \sum_{\text{type} \in \{1,2,3\}} T_{\text{setting}, \text{type}} (t) \omega^{[\text{type}/3]} r_{\text{setting}}^n - T_{\text{setting}, \text{type}=2} (t) \lambda r_{\text{setting}}^n - \alpha_{\text{setting}} r_{\text{setting}}^n + \epsilon(t) S_{\text{setting}}^n$$

$$\dot{r}_{\text{setting}}^{a;\kappa=1} = (-1)^\eta \left( \theta_h(t) S_{\text{setting}}^a - \mu_h r_{\text{setting}=\text{hospitals}}^{a;\kappa=1} \right) + \sum_{\text{type} \in \{1,2,3\}} T_{\text{setting}, \text{type}} (t) \omega^{[\text{type}/3]} r_{\text{setting}}^n \kappa - \alpha_{\text{setting}} r_{\text{setting}}^{a;\kappa=1} - \lambda \left( T' - \phi_{\text{setting}} \right) r_{\text{setting}}^{a;\kappa=1} - \phi_{\text{setting}} r_{\text{setting}}^{a;\kappa=1}$$

$$\dot{r}_{\text{setting}}^{a;\kappa=0} = (-1)^\eta \left( \theta(t) S_{\text{setting}}^a - \mu_h r_{\text{setting}=\text{hospitals}}^{a;\kappa=0} \right) + \frac{1}{N_{\text{setting}}} \beta_{\text{setting}} \left( r_{\text{setting}}^n + v_i \sum_{\kappa \in \{0,1\}} r_{\text{setting}}^{a;\kappa} \right) S_{\text{setting}}^a v_s + \sum_{\text{type} \in \{1,2,3\}} T_{\text{setting}, \text{type}} (t) \omega^{[\text{type}/3]} r_{\text{setting}}^n (1 - \kappa) - T_{\text{setting}, \text{type}=2} (t) \lambda r_{\text{setting}}^{a;\kappa=0} - \alpha_{\text{setting}} r_{\text{setting}}^{a;\kappa=0} + \epsilon(t) S_{\text{setting}}^a v_s + \phi_{\text{setting}} r_{\text{setting}}^{a;\kappa=1}$$

Where:

- Superscripts  $n$ : normal and  $a$ : amplified represent levels of susceptibility to and infectiousness of colonization.
- Subscript  $\text{setting} = \{\text{hospitals}, \text{community}\}$
- $\kappa = 1$  indicates resistance associated with erroneous treatment of an infection associated with *ESBL-producing Klebsiella pneumoniae*
- $N_{\text{setting}}$  denotes the total population in each setting
- $\eta = \begin{cases} 0, & \text{if } \text{setting} = h \\ 1, & \text{if } \text{setting} = c \end{cases}$
- $\kappa = 1$  indicates resistance associated with erroneous treatment of an infection associated with *ESBL-producing Klebsiella pneumoniae*
